# Supplementary material for: Guided cellular orientation concurrently with cell density gradient on butterfly wings
Source: Royal Society of Chemistry journal article supplement (doi:10.1039/c9ra03961a), 2019-01-01
Supplement: c9ra03961a1.pdf [file c9ra03961a1.pdf]

Supporting Information for

# Guided cellular orientation concurrently with cell density gradient on butterfly wings

*Jie Lu,<sup>a</sup> Ye Pan,<sup>\*a</sup> Qifeng Zhong,<sup>b</sup> Bing Liu<sup>c</sup>*

<sup>a</sup> School of Material Science and Engineering, Southeast University, Nanjing 210096,

China E-mail: [panye@seu.edu.cn](mailto:panye@seu.edu.cn)

<sup>b</sup> Department of Pharmaceutical Equipment and Electronic Instruments, School of Engineering, China Pharmaceutical University, Nanjing 210009, China

<sup>c</sup> Department of Pharmaceutical Equipment and Electronic Instruments, School of Engineering, China Pharmaceutical University, Nanjing 210009, China

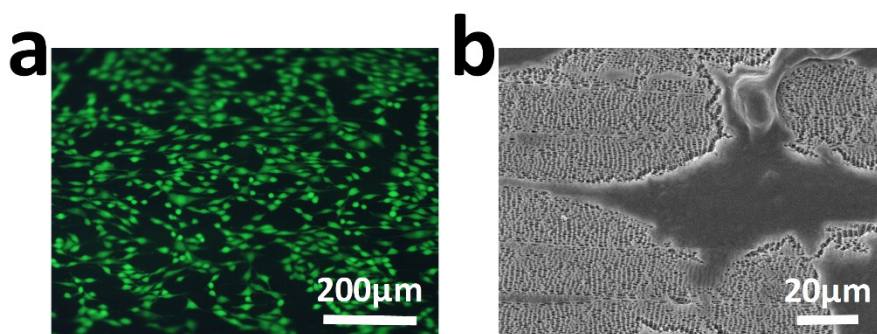

**Fig. S1** Fluorescence microscopy image and SEM image of NIH-3T3 fibroblasts cultured on the hybrid substrate patterned stripes-like structure.

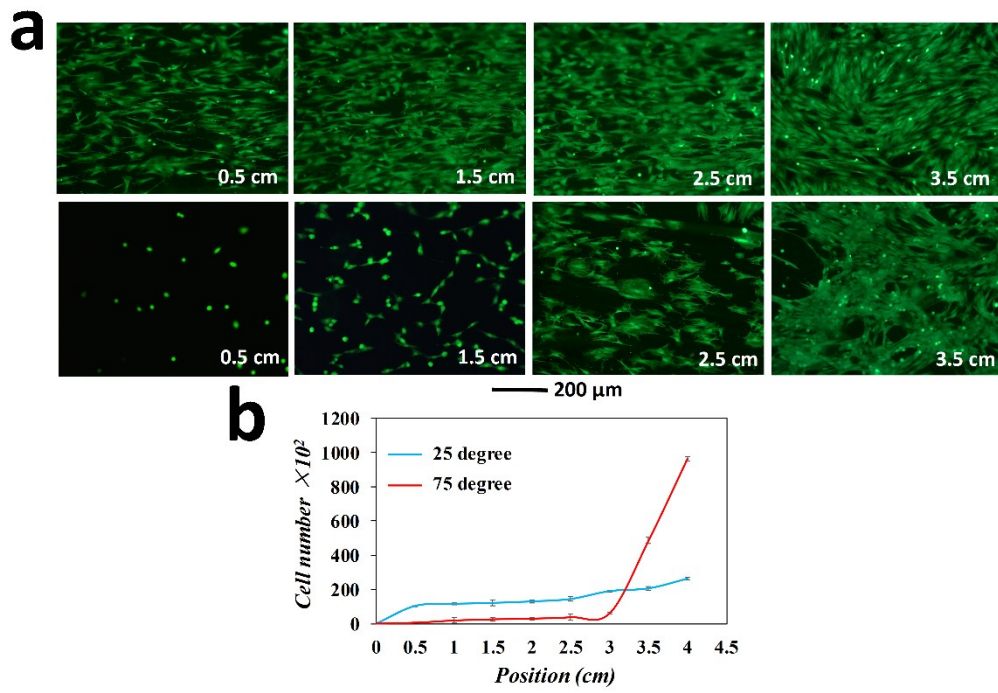

**Fig. S2** (a) Fluorescence images of gradient in cell density generated on the M. Menelaus wing at tilt angle of 25 degree (the upper line) and 75 degree (the lower line); (b) cell density calculation along the wing.
